# Supplementary material
Source: PubMed Central journal article supplement (PMC4698038)
Supplement: NIHMS733194-supplement.pdf [file NIHMS733194-supplement.pdf]

**A**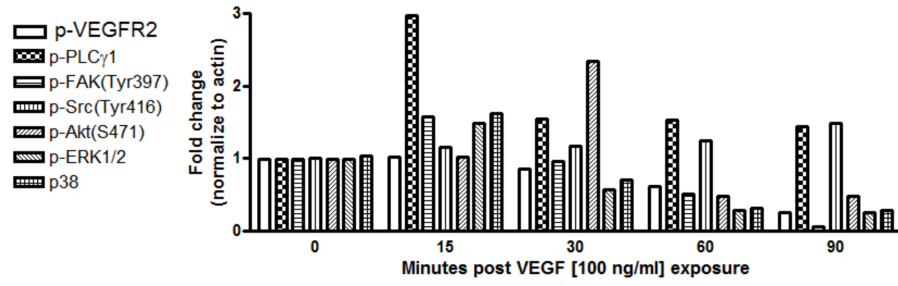**B**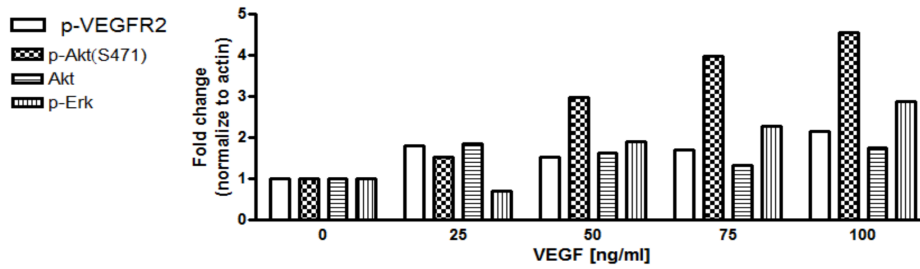

**Supplementary Figure 1.** Densitometric analysis of Western blot experiments shown in figure A) 2A and B) 2B showing a dose-dependent activation of VEGF-A's downstream pathway.
